# Supplementary material
Source: PubMed Central journal article supplement (PMC5823527)
Supplement: NIHMS941904-supplement-6.pdf [file NIHMS941904-supplement-6.pdf]

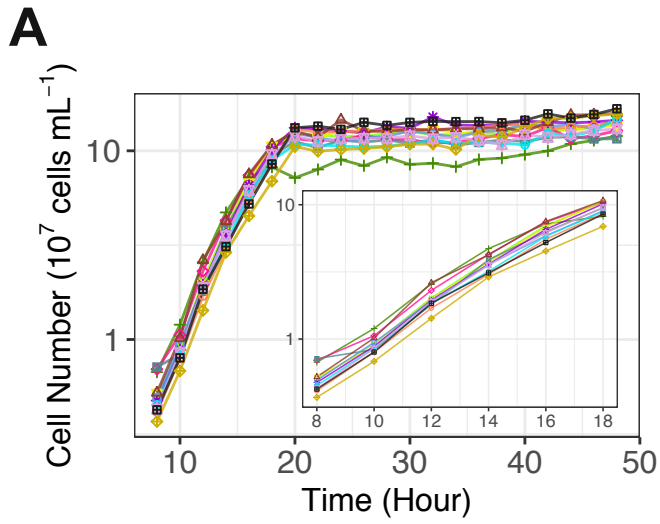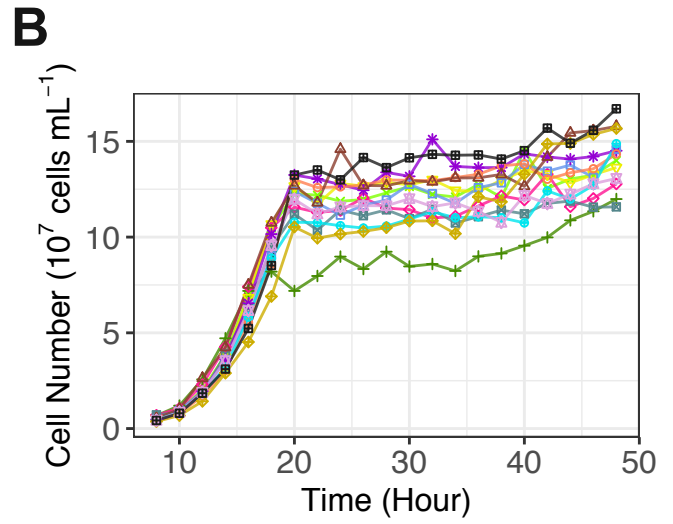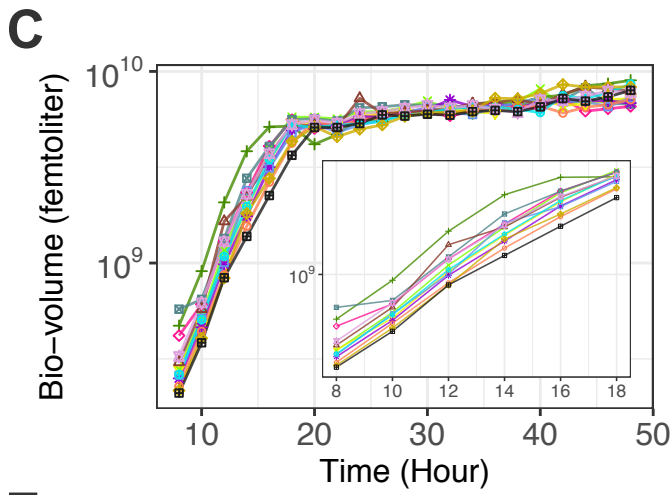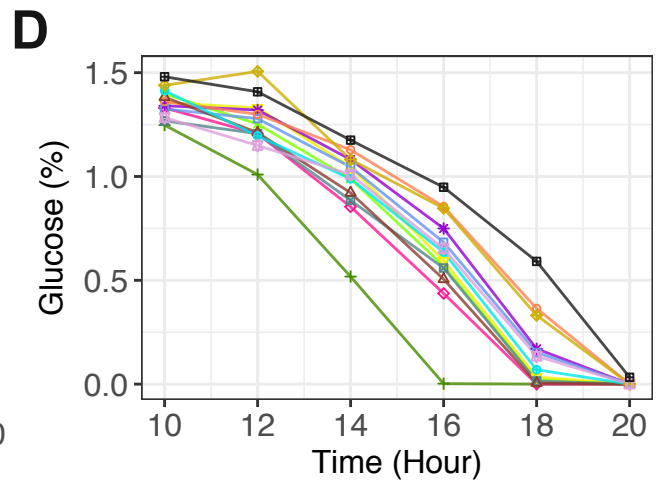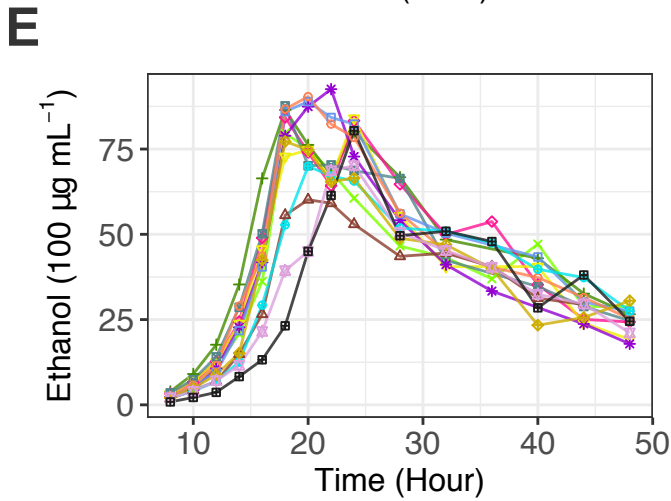

- *CYR1*
- ⊠ *Diploid*
- *GPB1*
- △ *GPB2*
- × *IRA1-MISSENSE*
- + *IRA1-NONSENSE*
- ◇ *IRA2*
- ▽ *KOG1*
- ⊕ *PDE2*
- ◇ *RAS2*
- ⊠ *SCH9+Diploid*
- ⋆ *TOR1*
- ⊠ *WT*

**Figure S1: Monoculture measurements, Related to Figure 1**

Twelve evolved clones and one WT clone were cultured in monocultures under the original evolutionary condition. Growth curves were measured using (A) cell number and (B) bio-volume. (A) shows cell number dynamics in a log scale and (B) shows cell number in a linear scale. The insets in (A) and (C) are the zoom-in of the growth curve during the fermentation phase.

(D) Glucose concentration and (E) Ethanol concentration of the cell cultures were measured across a single growth cycle. Glucose was exhausted around 20h, which gives an estimate for the end of fermentation.

**A**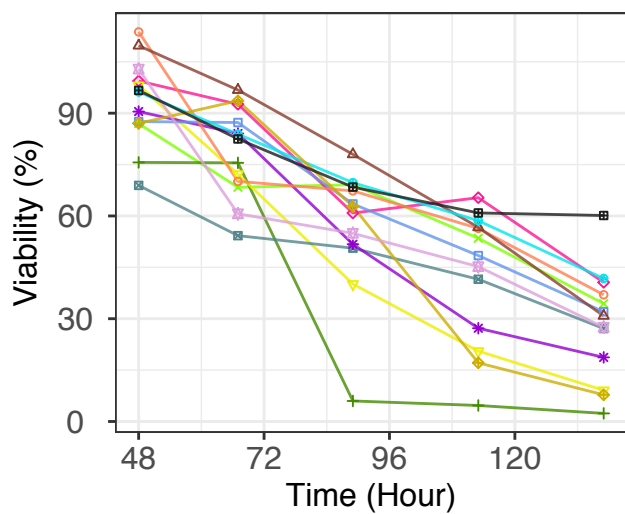**B**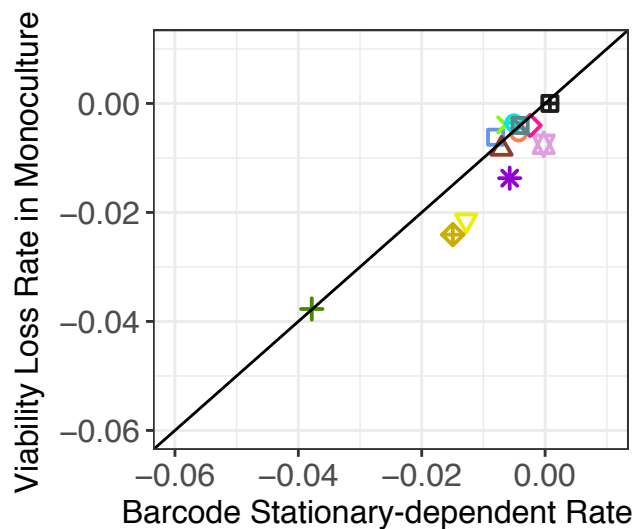

□ *CYR1*  
 ○ *GPB1*  
 × *IRA1-MISSENSE*  
 ◇ *IRA2*  
 ⊕ *PDE2*  
 ⊠ *SCH9+Diploid*  
 ⊞ *WT*  
☆ *Diploid*  
△ *GPB2*  
+ *IRA1-NONSENSE*  
▽ *KOG1*  
◆ *RAS2*  
\* *TOR1*

**Figure S2: Viability measurements in monoculture, Related to Figure 5**

Twelve evolved clones and one WT clone were cultured in monocultures under the original evolutionary condition. (A) Their viability was tracked from 48h (2 Day) up to 137h (~6 Day).

(B) Relationship between the twelve evolved clones' viability loss rate per hour in monoculture and their stationary-dependent rate estimated from the high-throughput barcode fitness measurements (Pearson's  $r = 0.92$ , 95% CI [0.56, 0.98];  $R^2 = 0.9$ ). The black line represents  $y=x$ .

**A**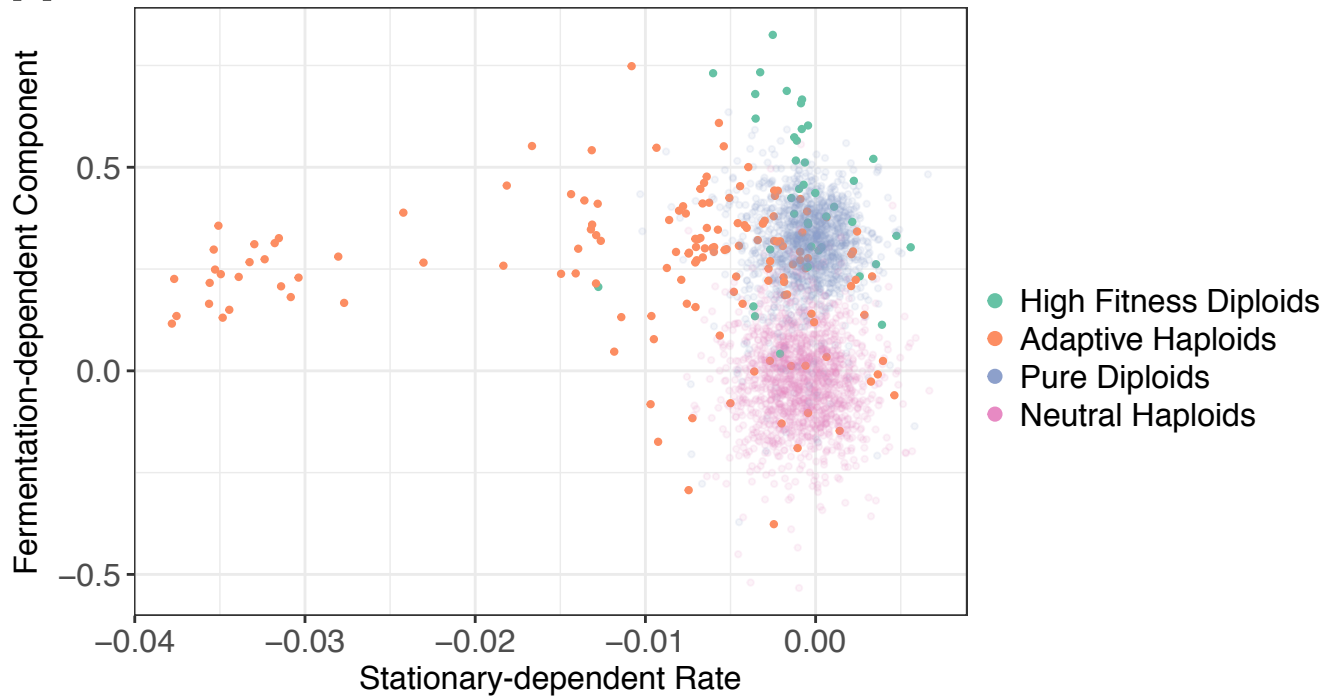**B**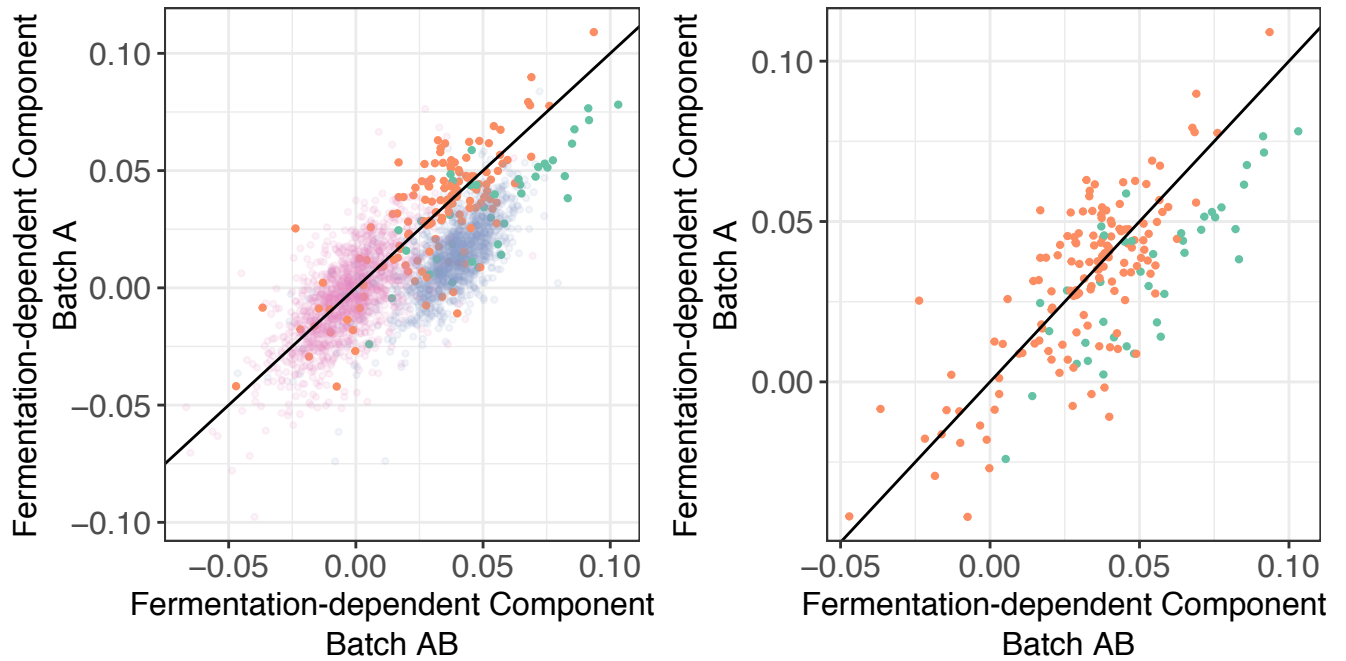

**Figure S3: Lack of trade-off between fermentation-dependent component and stationary-dependent rate and fermentation-dependent component estimation,**

**Related to Figure 5**

(A) Correlation between the fermentation-dependent component and the stationary-dependent rate estimated from the high throughput barcode fitness measurements (Pearson's  $r = 0.06$ , 95% CI [0.01, 0.1] for all adaptive lineages). Each dot represents one evolved lineage and is colored by their ploidy and fitness class under the EC.

(B) Fitness measurements with varying number of generations during fermentation were conducted in two batches: Batch A (4, 6, and 8 generations during fermentation) and Batch B (8 and 9 generations during fermentation). Fermentation-dependent component estimated using measurements from both Batch A and B vs. that estimated only using measurements under Batch A. The left panel contains all lineages in the pool with each dot represents a lineage, while the right panel contains only adaptive haploids and high fitness diploids.

**A**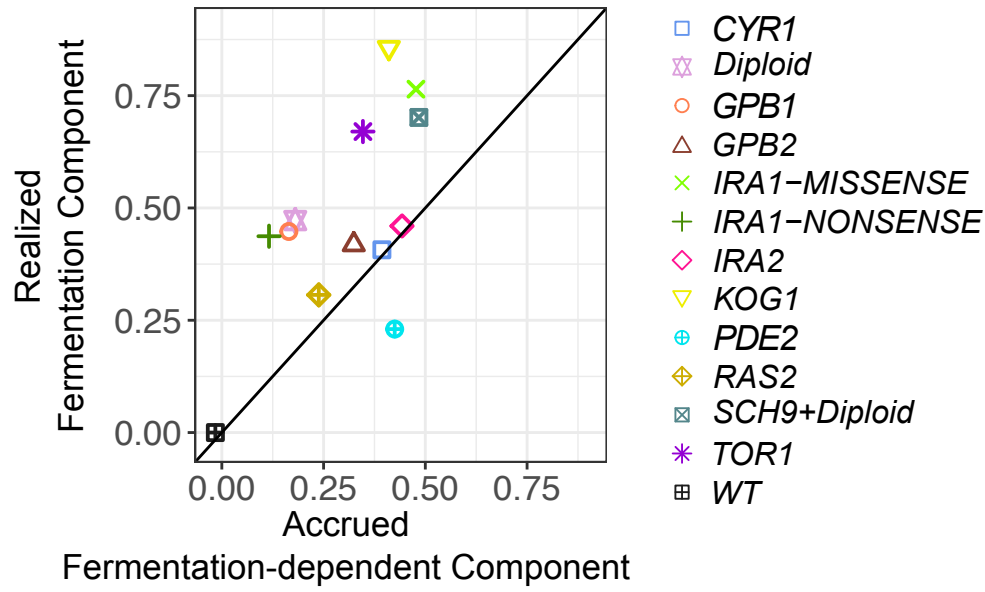**B**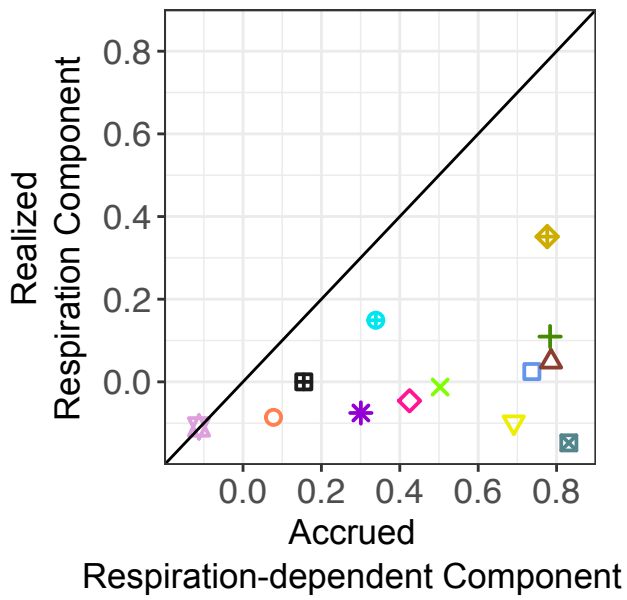**C**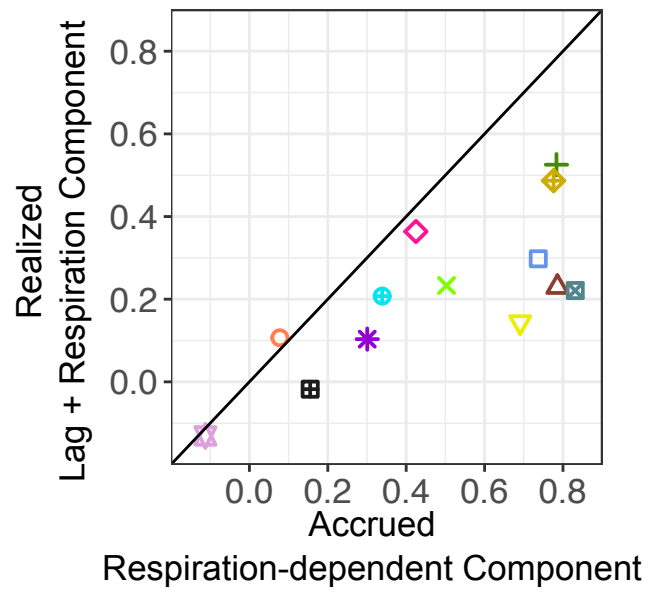

**Figure S4: Comparison of fitness components estimated from different approaches, Related to Figure 6**

Comparison of the realized fitness component estimated from the monoculture measurements with the corresponding accrued component estimated from the high-throughput barcode fitness measurements: (A) realized fermentation component from the monoculture measurements with the accrued fermentation-dependent component from the barcode fitness measurements (Pearson's  $r = 0.66$ , 95% CI [0.1, 0.91]); (B) realized respiration component from the monoculture measurements with the accrued respiration-dependent component from the barcode fitness measurements; (C) combined realized fitness from the lag and the respiration phases estimated from the monoculture cell number measurements with the accrued respiration-dependent component estimated from the barcode fitness measurements (Pearson's  $r = 0.75$ , 95% CI [0.31, 0.92]).

Note, the *ira1-nonsense* mutant is consistently an outlier for each measurement and was excluded from correlation calculations.



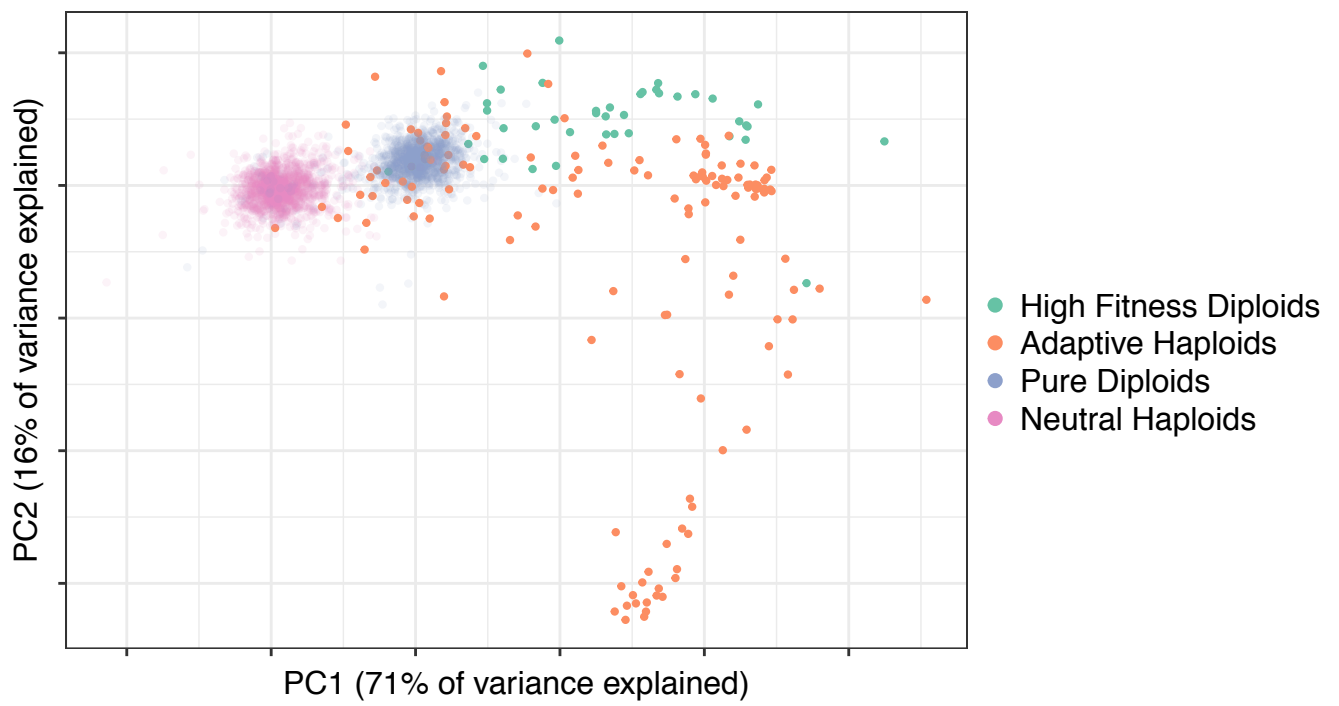

**Figure S5: PCA analysis using fitness profiles of 3,048 evolved clones, Related to**

**Figure 7**

Principal component analysis for all lineages in the pool using their fitness measurements under all test conditions (Figure 3AB). Each dot represents a lineage and is colored by its class.

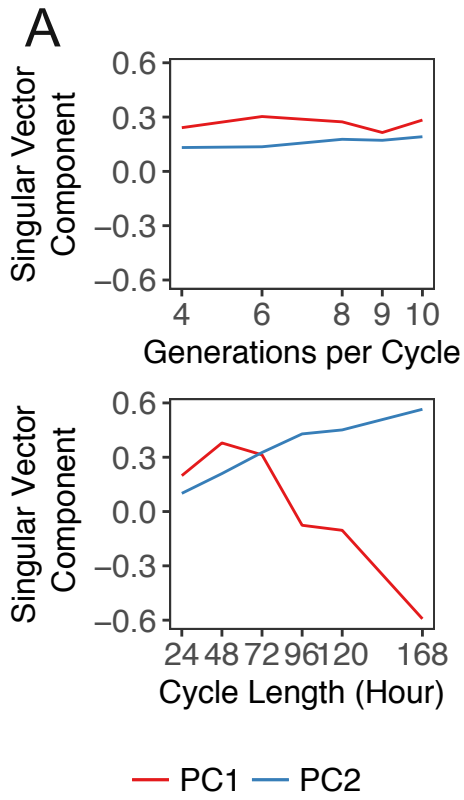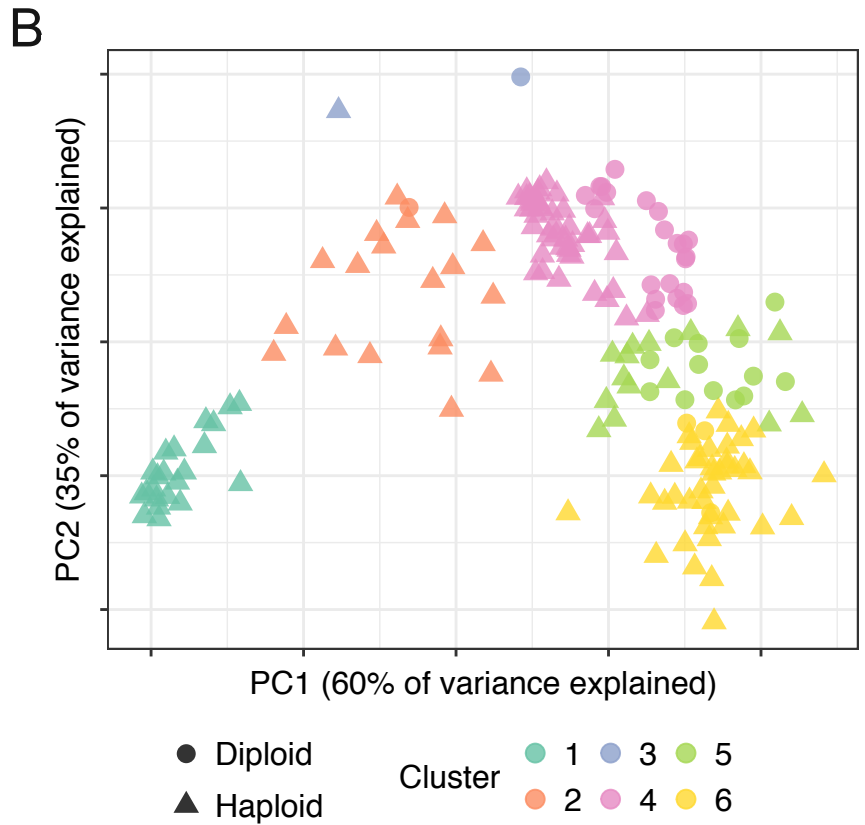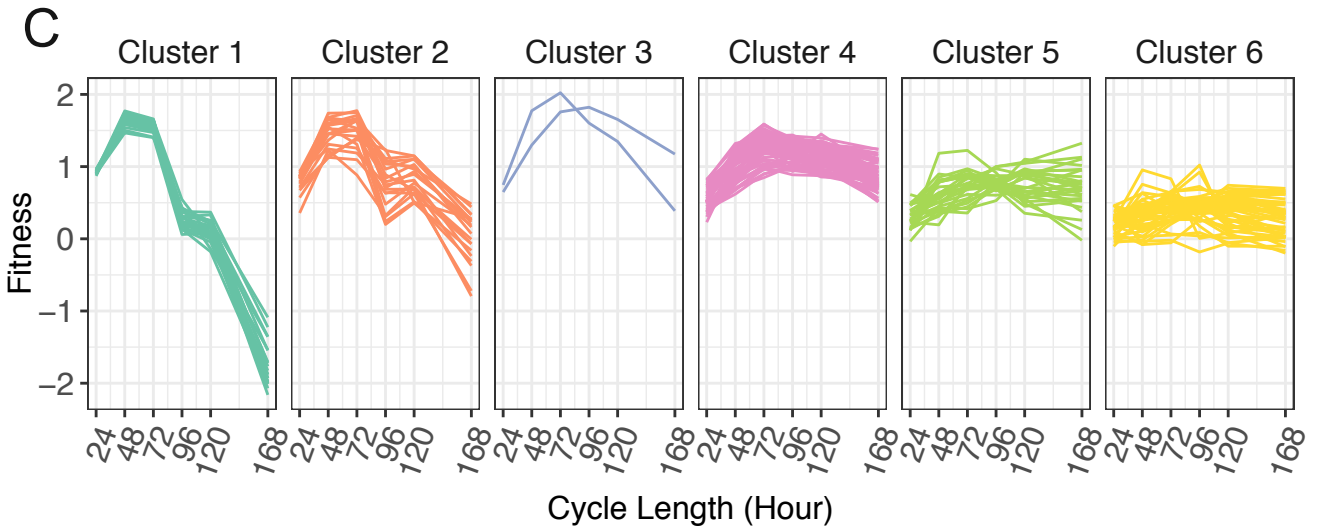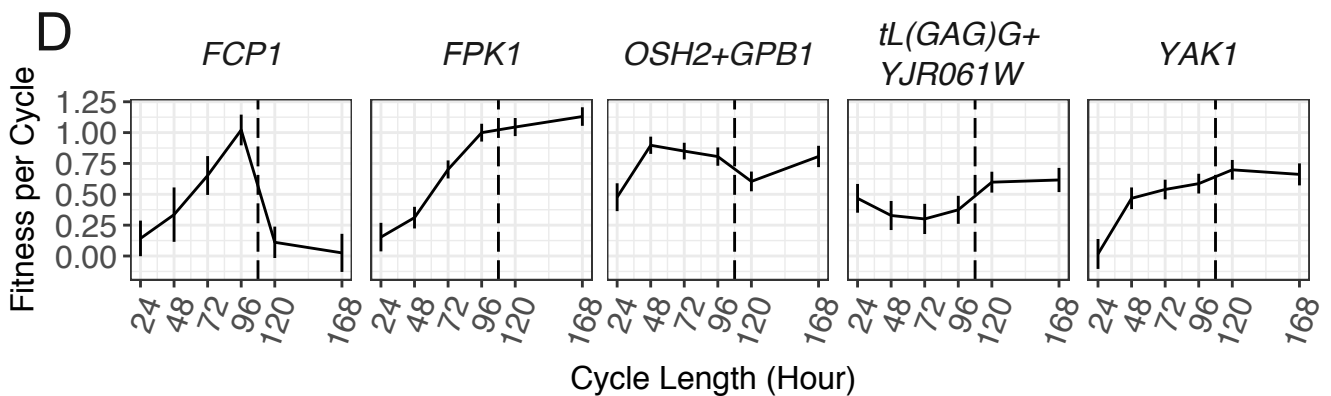

**Figure S6: Singular vectors in the PCA and clustering analysis using PCA, Related to Figure 7**

(A) Singular vectors corresponding to PC1 and PC2 in the PCA using adaptive haploids and high fitness diploids. For the convenience of comparing between PC1 and PC2, we plot the negative vector of PC1 (-PC1) in this figure. Top: singular vector components corresponding to conditions with varying dilution. Bottom: singular vector components corresponding to conditions with varying growth cycle. Singular vector of PC1 corresponds mostly to curvature of varying growth cycle experiments; singular vector of PC2 corresponds to its slope.

(B) Lineages are grouped into 6 clusters by applying hierarchical clustering to lineages' PCs.

(C) Fitness trajectories of adaptive haploids and high fitness diploids from each cluster, under varying cycle length conditions.

(D) Cluster 5 and 6 contain lineages that behave differently from the majority of the nutrient response pathway mutants. The fitness trajectories of five clones from clusters 5 and 6 are shown here. *OSH2+GPB1* and *FPK1* mutants are from cluster 5. *FCP1*, *tL(GAG)G+YJR061W* and *YAK1* mutants are from cluster 6. The vertical dashed line separates Batch C and Batch D of experiments (see STAR Methods). *GPB1* and *YAK1* are Ras/PKA pathway genes.

| <b>Strain Name</b>   | <b>Barcode ID</b> | <b>Mutated Gene</b> | <b>Mutation Type</b> | <b>Ploidy</b> |
|----------------------|-------------------|---------------------|----------------------|---------------|
| <i>CYR1</i>          | 43692             | <i>CYR1</i>         | missense_variant     | Haploid       |
| <i>Diploid</i>       | 3920              | N/A                 | N/A                  | Diploid       |
| <i>GPB1</i>          | 75669             | <i>GPB1</i>         | stop_gained          | Haploid       |
| <i>GPB2</i>          | 7774              | <i>GPB2</i>         | stop_gained          | Haploid       |
| <i>IRA1-MISSENSE</i> | 43361             | <i>IRA1</i>         | missense_variant     | Haploid       |
| <i>IRA1-NONSENSE</i> | 21967             | <i>IRA1</i>         | stop_gained          | Haploid       |
| <i>IRA2</i>          | 6582              | <i>IRA2</i>         | missense_variant     | Haploid       |
| <i>KOG1</i>          | 24737             | <i>KOG1</i>         | missense_variant     | Haploid       |
| <i>PDE2</i>          | 20967             | <i>PDE2</i>         | stop_gained          | Haploid       |
| <i>RAS2</i>          | 11430             | <i>RAS2</i>         | missense_variant     | Haploid       |
| <i>SCH9+Diploid</i>  | 14485             | <i>SCH9</i>         | missense_variant     | Diploid       |
| <i>TOR1</i>          | 21543             | <i>TOR1</i>         | missense_variant     | Haploid       |
| <i>WT</i>            | 304935            | N/A                 | N/A                  | Haploid       |

**Table S1: Strain information of twelve evolved strains measured in monocultures and high-resolution pairwise competition assays, Related to Figures 1 and 2**

Note that strain *IRA1-NONSENSE*, *RAS2* and *SCH9+Diploid* carry additional mutations in genes not listed in this table (see Data S4 for details).

| Measurement Group | Name                           | Number of parallel technical replicates | Growth time per cycle | Inoculated cells per cycle | Approximate generations per cycle |
|-------------------|--------------------------------|-----------------------------------------|-----------------------|----------------------------|-----------------------------------|
| Batch A           | Generations per cycle - 4      | 3                                       | 40h                   | 8e+8                       | 4                                 |
| Batch A           | Generations per cycle - 6      | 3                                       | 44h                   | 2e+8                       | 6                                 |
| Batch A           | Generations per cycle - 8 / EC | 3                                       | 48h                   | 5e+7                       | 8                                 |
| Batch B           | Generations per cycle - 8 / EC | 3                                       | 48h                   | 5e+7                       | 8                                 |
| Batch B           | Generations per cycle - 9      | 3                                       | 50h                   | 2.5e+7                     | 9                                 |
| Batch C           | Cycle Length - 1 day           | 3                                       | 24h                   | 5e+7                       | 8                                 |
| Batch C           | Cycle Length - 2 days / EC     | 2                                       | 48h                   | 5e+7                       | 8                                 |
| Batch C           | Cycle Length - 3 days          | 3                                       | 72h                   | 5e+7                       | 8                                 |
| Batch C           | Cycle Length - 4 days          | 3                                       | 96h                   | 5e+7                       | 8                                 |
| Batch D           | Cycle Length - 5 days          | 3                                       | 120h                  | 5e+7                       | 8                                 |
| Batch D           | Cycle Length - 6 days          | 3                                       | 144h                  | 5e+7                       | 8                                 |
| Batch D           | Cycle Length - 7 days          | 3                                       | 168h                  | 5e+7                       | 8                                 |

**Table S2: Detailed parameters of measurement conditions, Related to Figure 3**



# Supplemental References

1. Venkataram, S., Dunn, B., Li, Y., Agarwala, A., Chang, J., Ebel, E.R., Geiler-Samerotte, K., Hérisant, L., Blundell, J.R., Levy, S.F., *et al.* (2016). Development of a Comprehensive Genotype-to-Fitness Map of Adaptation-Driving Mutations in Yeast. *Cell* *166*, 1585–1596.e22.
